# Supplementary material for: Impact of Pd-mordenite pretreatment on the heterogeneity of Heck catalysisElectronic supplementary information (ESI) available: XRD patterns, TEM and SEM images. See http://www.rsc.org/suppdata/cc/b2/b201180h/
Source: Royal Society of Chemistry journal article supplement (doi:10.1039/b201180h), 2002-04-18
Supplement: b201180h.pdf [file b201180h.pdf]

## TEM and SEM analysis

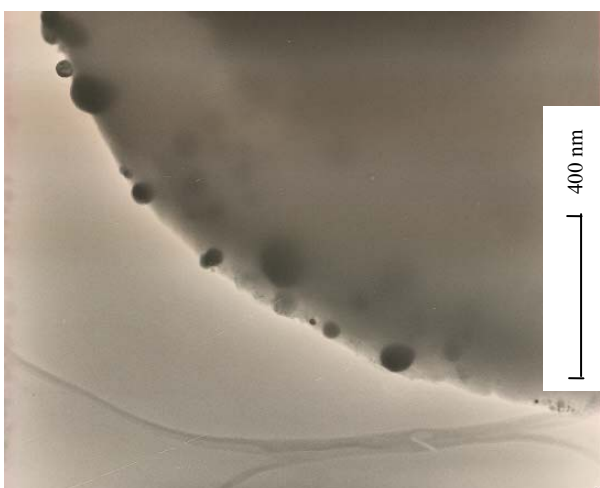

a) TEM of Pd(0)-mordenite (4 wt.% Pd), reduced by H<sub>2</sub>.

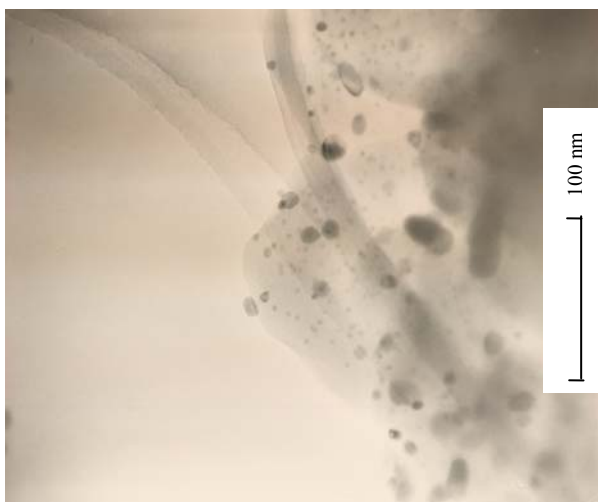

b) TEM of Pd(0)-mordenite (4 wt.% Pd), autoreduced by N<sub>2</sub>.

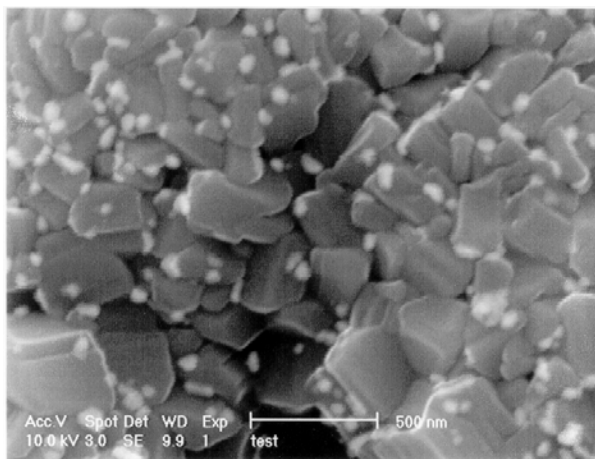

c) SEM of Pd(0)-mordenite (4 wt.% Pd), autoreduced by N<sub>2</sub>.
