# Supplementary material for: Impact of Pd-mordenite pretreatment on the heterogeneity of Heck catalysisElectronic supplementary information (ESI) available: XRD patterns, TEM and SEM images. See http://www.rsc.org/suppdata/cc/b2/b201180h/
Source: Royal Society of Chemistry journal article supplement (doi:10.1039/b201180h), 2002-04-18
Supplement: b201180h1.doc [file b201180h1.doc]

Intensity (a.u.)

Na+-mordenite

2

PdO

Pd

Pd

Pd(NH3)42+-mordenite (0.4 wt.% Pd)

PdO-mordenite (4 wt.% Pd)

Pd0-mordenite (4 wt.% Pd)

Pd0-mordenite (0.4 wt.% Pd),

after reaction

# XRD-diffractograms
